# Supplementary material
Source: PubMed Central journal article supplement (PMC5075037)
Supplement: JB.00458-16_zjb999094226so1.pdf [file JB.00458-16_zjb999094226so1.pdf]

**Table S1. Strains, plasmids, and primers used in this study.**

| Strain, Plasmid, or Primer                          | Genotype/Relevant Characteristic                                                             | Source*                           |
|-----------------------------------------------------|----------------------------------------------------------------------------------------------|-----------------------------------|
| <i>S. cerevisiae</i> INVSc1                         | MATa <i>his3D1 leu2 trp1-289 ura3-52 MAT his3D1 leu2 trp1-289 ura3-52</i>                    | Shanks et al. 2006                |
| <i>E. coli</i> S17-1(lpir)                          | <i>thi pro hsdR- hsdM+ DrecA RP4-2::TcMu-Km::Tn7</i>                                         | Shanks et al. 2006                |
| SMC232                                              | Wild type PA14                                                                               | Zegans et al. 2009                |
| SMC5489                                             | DMS3vir mutant (no bacteria)                                                                 | Cady and Bondy-Denomy et al. 2012 |
| SMC7475                                             | DMS3vir-PC mutant (no bacteria)                                                              | This Study                        |
| SMC4279                                             | ΔPA14_CRISPR Region (CR)                                                                     | Cady et al. 2011                  |
| SMC4277                                             | PA14 Δ <i>cas1</i>                                                                           | Cady et al. 2011                  |
| SMC7361                                             | PA14 Δ <i>recD</i>                                                                           | This Study                        |
| SMC7362                                             | PA14 MarTX7:: <i>recG</i>                                                                    | Liberati et al. 2006              |
| SMC4707                                             | PA14 ΔPA14_CRISPR2 +CRISPR2 Δ <i>spacer1-2</i>                                               | Cady et al. 2011                  |
| SMC7442                                             | PA14 Δ <i>recG</i>                                                                           | This Study                        |
| SMC7440                                             | PA14 ΔPA14_CRISPR1_CRISPR2 + CRISPR2 Δ <i>spacers 1-19</i>                                   | This Study                        |
| SMC7476                                             | PA14 ΔPA14_CRISPR1_CRISPR2 + CRISPR2 Δ <i>spacers 1-19 + sp20-5MM</i>                        | This Study                        |
| SMC7441                                             | PA14 ΔPA14_CRISPR1_CRISPR2 + CRISPR2 leader and repeat (CRISPR2-Minimum)                     | This Study                        |
| <b>Plasmids</b>                                     |                                                                                              |                                   |
| pMQ30                                               | <i>P. aeruginosa</i> suicide vector for clean deletions; GmR                                 | Shanks et al. 2006                |
| pMQ30- <i>recG</i> -KO                              | For generating <i>recG</i> deletions in <i>P. aeruginosa</i> ; GmR                           | This Study                        |
| pMQ30- <i>recD</i> -KO                              | For generating <i>recD</i> deletions in <i>P. aeruginosa</i> ; GmR                           | This Study                        |
| pMQ30-CRISPR2 Δ <i>spacers 1-19</i> KOon            | For knocking on CRISPR2 Δ <i>spacers 1-19</i> onto a ΔCRISPR1 ΔCRISPR2 backg                 | This Study                        |
| pMQ30-CRISPR2 Δ <i>spacers 1-19 + sp20-5MM</i> KOon | For knocking on CRISPR2 Δ <i>spacers 1-19 + sp20-5MM</i> onto a ΔCRISPR1 ΔCRISPR2 background | This Study                        |
| pMQ30-CRISPR2 leader and repeat                     | For knocking on the CRISPR2 leader and a single repeat onto a ΔCRISPR1 ΔCRISPR2 background   | This Study                        |
| pMQ30-DMS3-24PC                                     | For generating a DMS3 mutant in which the C2_sp20 target has the correct PAM                 | This Study                        |
| <b>Primers</b>                                      |                                                                                              |                                   |
| <i>recD</i> KO primer 1                             | ctgttttatcagaccgcttctgctgtctgaagacgctccaggcgccctggatttc                                      |                                   |
| <i>recD</i> KO primer 2                             | atcccagagccgagcgcgtgcccccggcggtcgg                                                           |                                   |
| <i>recD</i> KO primer 3                             | cgcccggggcgacgcgctcggtcgggatcgctgg                                                           |                                   |
| <i>recD</i> KO primer 4                             | ggataacaatttcacacaggaacagctatgtcgacctgtggctggaacagtatctcgcc                                  |                                   |
| Δ <i>recD</i> Sequencing primer For                 | GTGTTGTACCTGCTGGCCCTGCACCCGG                                                                 |                                   |
| Δ <i>recD</i> Sequencing primer Rev                 | CGGCAGCCTCGACCCGGAATCCCTG                                                                    |                                   |
| MarTX7 Transposon Check Forward                     | TGTCAACTGGGTTCGTGCCTTCATCCG                                                                  |                                   |
| <i>recG</i> Transposon Check Forward                | GTTCGGTACCGTTGCCATCGCCTGG                                                                    |                                   |
| <i>recG</i> Transposon Check Reverse                | GGCTTCTGTATGACGAGACCATGCG                                                                    |                                   |
| <i>recG</i> KO primer 1                             | CTGTTTTATCAGACCGCTTCTGCGTCTGATGCCCCGGAGGTTGGTTCGCGGGC                                        |                                   |
| <i>recG</i> KO primer 2                             | CGAGAGCGAAATAGATCATGCGATTTGGCGTGTTCCTGGGTTGCGG                                               |                                   |
| <i>recG</i> KO primer 3                             | CCGCAATTCGATGATCTATTTTCGCTCTCGCTGACCGCGTAGGTC                                                |                                   |
| <i>recG</i> KO primer 4                             | CGGATAACAATTTACACAGGAACAGCTATGAGGCCCTCGATCACCGGCGGGTGTAG                                     |                                   |
| <i>recG</i> sequencing For                          | GAGAACAAGCACACCACGGTGGAGTCTCGTCG                                                             |                                   |
| <i>recG</i> sequencing Rev                          | CGGCAGGCGATGCCTAGCTTGGCG                                                                     |                                   |
| CRISPR2sp1-19 KO 1                                  | TTATCAGACCCGCTTCTGCGTCTGATGTAGCACCCGAGTCCATGGGAAATGCCAGCAC                                   |                                   |
| CRISPR2sp1-19 KO 2                                  | GTTCACTGCGGTGTAGGCAGCTAAGAAATTCACGGCG                                                        |                                   |
| CRISPR2sp1-19 KO 3                                  | TTTCTTAGCTGCCTACACGGCAGTGAACCTAGCTCCGAAAAC                                                   |                                   |
| CRISPR2sp1-19 KO 4                                  | AACAATTTACACAGGAACAGCTATGCAATCGGCGGATAACGCCCATGGCGTTATTTCG                                   |                                   |
| CRISPR2sp1-19 Seq For                               | ATATTCGGATGTTGGTAGTGGGATGGGAGG                                                               |                                   |
| CRISPR leader + repeat 1                            | AGTCACGACGTTGTAAAACGACGGCCGTAGCACCCGAGTCCATGGGAAATGCCAGCAC                                   |                                   |
| CRISPR leader + repeat 2                            | CTAGTTCACTGCCGTGTAGGCAGCTAAGAACTCGAACCACC                                                    |                                   |
| CRISPR leader + repeat 3                            | CCTACACGGCAGTGAACCTAGCTCCGAAAACCTATAACCATTTGAAGG                                             |                                   |
| CRISPR leader + repeat 4                            | TAACAATTTACACAGGAACAGCTATGCAATCGGCGGATAACGCCCATGGCGTTATTTCG                                  |                                   |
| CRISPR1 Insertion Check For                         | gctgaacagctaggccgttctgaac                                                                    |                                   |
| CRISPR1 Insertion Check Rev                         | cgtgtcgtccgatctgtgacagta                                                                     |                                   |
| CRISPR2 Insertion Check For                         | acgaacgccgtccagaagtcaacc                                                                     |                                   |
| CRISPR2 Insertion Check Rev                         | gagggtttctggcgggaaaaactcggtatttc                                                             |                                   |
| CRISPR2 Sequence For                                | TGGTCTGCCTAGACGGCAGCGAACCCGGC                                                                |                                   |
| CR2sp1-19KOsp20_5MM 2                               | GAAATTCACCGCAGCCTTGATGTCGCGCTCAACCTGG                                                        |                                   |
| CR2sp1-19KOsp20_5MM 3                               | CCAGGTTGAGGCGGACATCAAGGCTGCGTGAATTC                                                          |                                   |
| CR2sp1-19KOsp20_5MM 4                               | CGGATAACAATTTACACAGGAACAGCTATGCCTCTACGCCGAAAGCGGCGCGG                                        |                                   |
| DMS324_PC 1                                         | tttatcagaccgcttctgctgtctgatcgacacccgcatatgcccacggcc                                          |                                   |
| DMS324_PC 2                                         | CGAGCAGTGCACCTTCCGGCGG                                                                       |                                   |
| DMS324_PC 3                                         | CCGCCGTGAAGTGCAGTGTCTG                                                                       |                                   |
| DMS324_PC 4                                         | cgataacaatttcacacaggaacagctatgCGGCCCTTGCCGGCCCTGGG                                           |                                   |
| DMS3vir Seq For (66)                                | CTTCTGCTCAAGCTGTAGCGCTAAAGG                                                                  |                                   |
| DMS3vir Seq For (66)                                | GCGCAAGTGCTTTAGCGGGAATGCTG                                                                   |                                   |
| DMS3-24-PC Seq For (65)                             | GCTGGAACACGACGGCGGAAGCCG                                                                     |                                   |
| DMS3-24-PC seq Rev (65)                             | GTGCTGCGGGAACCGCTCACGGATG                                                                    |                                   |
| DMS3-24 Check For (66)                              | GTTGCCTGCGGCTGCTCGCG                                                                         |                                   |
| DMS3-24 Check Rev (66)                              | AGGCCTTGAAATGTACCCCTGCAATTCGTGTGTT                                                           |                                   |

\*See main text for complete references of literature cited.
